# Supplementary material for: How fast can raptors see?
Source: Oxford University Press journal article supplement (doi:10.1242/jeb.209031), 2019-01-01
Supplement: jeb209031supp.pdf [file jeb209031supp.pdf]

**Table S1.** Pairwise comparison of the effect of Luminance and Order on FFFs (flicker fusion frequencies).

[Click here to Download Table S1](#)
